# Supplementary material for: A human sleep homeostasis phenotype in mice expressing a primate-specific PER3 variable-number tandem-repeat coding-region polymorphism
Source: PubMed Central journal article supplement (PMC4046067; doi:10.1096/fj.13-240135), 2014-06
Supplement: supp_fj.13-240135_13-240135SuppData.pdf [file supp_fj.13-240135_13-240135SuppData.pdf]

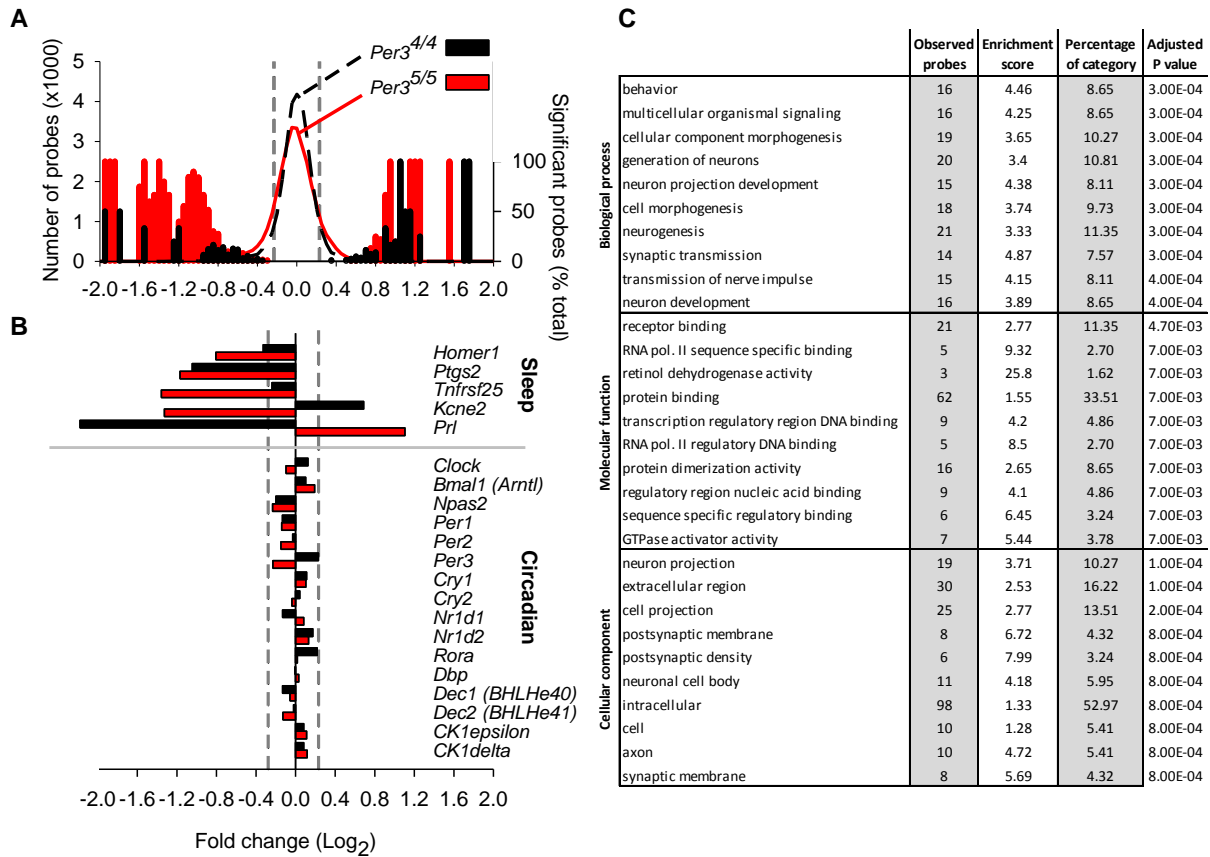

**Figure S1.** Hypothalamic gene expression in transgenic compared to WT mice. (A) The distributions (number of probes) of normalized fold change ( $\text{Log}_2$ ) in expression of all detected hypothalamic probes between  $Per3^{4/4}$  compared to WT (black line) and  $Per3^{5/5}$  compared to WT (red line). The percentage of these detected probes that were significantly differentially expressed are also indicated with the right-hand axis (black bars =  $Per3^{4/4}$ , red bars =  $Per3^{5/5}$ ). (B) Horizontal bars (black =  $Per3^{4/4}$ , red =  $Per3^{5/5}$ ) indicate the up- and down-regulated fold changes ( $\text{Log}_2$ ) in the differential expression (compared to WT) of five genes associated with sleep homeostasis (top), and a core set of circadian clock genes (bottom). The vertical grey dashed lines in panels A and B indicate the maximal fold change observed in the clock gene transcripts, which were all non-significant. (C) Gene ontology analysis of biological process, molecular function, and cellular component terms that were associated with differentially expressed hypothalamic genes in  $Per3^{5/5}$  compared with WT (number of observed probes contributing to each term, enrichment score, percentage of differentially expressed genes contributing to each term and adjusted P value are indicated). Gene ontology analysis did not reveal significant terms for the differential expression in the  $Per3^{4/4}$  mice due to the smaller number of probes analyzed.

| ProbeName    | GeneSymbol     | Per3 <sup>4/4</sup><br>vs.Per3 <sup>5/5</sup> | WT vs Per3 <sup>4/4</sup><br>and/or Per3 <sup>5/5</sup> | Per3 <sup>5/5</sup> | Per3 <sup>4/4</sup> | WT       |
|--------------|----------------|-----------------------------------------------|---------------------------------------------------------|---------------------|---------------------|----------|
| A_52_P267651 | <i>Arntl</i>   |                                               |                                                         | -0.12898            | 0.10941             | -0.04331 |
| A_51_P272553 | <i>Bhlhe40</i> |                                               |                                                         | -0.01092            | -0.04802            | 0.04374  |
| A_51_P451176 | <i>Bhlhe41</i> |                                               | P = 0.0052                                              | 0.16994             | 0.06284             | -0.31015 |
| A_52_P618912 | <i>Bhlhe41</i> |                                               |                                                         | 0.26348             | 0.07570             | -0.23859 |
| A_52_P161365 | <i>Clock</i>   |                                               |                                                         | 0.11360             | -0.15249            | -0.01458 |
| A_52_P279391 | <i>Clock</i>   |                                               |                                                         | 0.11598             | -0.07711            | 0.00522  |
| A_52_P334670 | <i>Clock</i>   |                                               | P = 0.0262                                              | 0.05596             | -0.14214            | 0.29667  |
| A_52_P334677 | <i>Clock</i>   |                                               |                                                         | -0.05199            | -0.14977            | 0.20162  |
| A_51_P302204 | <i>Cry1</i>    |                                               |                                                         | -0.25761            | 0.06965             | -0.06256 |
| A_52_P420500 | <i>Cry1</i>    |                                               | P = 0.0458                                              | -0.68362            | -0.50719            | 0.31876  |
| A_51_P135542 | <i>Cry2</i>    |                                               | P = 0.0055                                              | 0.00655             | 0.08840             | -0.49925 |
| A_52_P248378 | <i>Cry2</i>    |                                               | P = 0.0434                                              | 0.06761             | 0.06106             | -0.16752 |
| A_51_P136277 | <i>Csnk1d</i>  |                                               | P = 0.0245                                              | 0.09405             | 0.32989             | -0.33567 |
| A_51_P359813 | <i>Csnk1d</i>  |                                               |                                                         | -0.12066            | -0.04088            | 0.10839  |
| A_52_P11576  | <i>Csnk1d</i>  |                                               |                                                         | 0.11080             | 0.18629             | -0.16877 |
| A_52_P477369 | <i>Csnk1d</i>  |                                               | P = 0.0161                                              | 0.22056             | 0.36733             | -0.37472 |
| A_51_P429197 | <i>Csnk1e</i>  |                                               |                                                         | 0.16857             | -0.02134            | -0.01003 |
| A_52_P542419 | <i>Csnk1e</i>  |                                               |                                                         | -0.00284            | 0.04857             | 0.00023  |
| A_51_P180492 | <i>Dbp</i>     |                                               | P = 0.0102                                              | 0.02481             | 0.08902             | -0.29256 |
| A_52_P534749 | <i>Npas2</i>   |                                               | P = 0.6067                                              | -0.00435            | -0.06607            | -0.17249 |
| A_51_P223776 | <i>Nr1d1</i>   |                                               | P = 0.0245                                              | 0.08307             | 0.12696             | -0.46491 |
| A_52_P130952 | <i>Nr1d1</i>   |                                               |                                                         | 0.11137             | 0.30631             | -0.36408 |
| A_52_P130961 | <i>Nr1d1</i>   |                                               |                                                         | -0.41301            | 0.11641             | -0.34571 |
| A_52_P303891 | <i>Nr1d2</i>   |                                               | P = 0.0363                                              | -0.08817            | -0.09040            | 0.23406  |
| A_52_P79889  | <i>Per1</i>    |                                               |                                                         | 0.09700             | 0.02805             | -0.01378 |
| A_51_P282760 | <i>Per2</i>    |                                               |                                                         | -0.09000            | -0.02738            | 0.09985  |
| A_52_P536869 | <i>Per2</i>    |                                               |                                                         | -0.12907            | 0.32956             | -0.13785 |
| A_51_P258493 | <i>Per3</i>    |                                               | P = 0.0372                                              | 0.25613             | -0.03558            | -0.21079 |
| A_51_P477779 | <i>Rora</i>    |                                               |                                                         | 0.15948             | -0.09179            | 0.16905  |
| A_52_P652442 | <i>Rora</i>    |                                               |                                                         | 0.23779             | -0.04323            | 0.01108  |
| A_52_P652950 | <i>Rora</i>    |                                               |                                                         | 0.35369             | -0.05030            | 0.04104  |

Supplemental table S1A: Clock gene expression in hypothalamic samples

| ProbeName    | GeneSymbol     | Per3 <sup>4/4</sup><br>vs.Per3 <sup>5/5</sup> | WT vs Per3 <sup>4/4</sup><br>and/or Per3 <sup>5/5</sup> | Per3 <sup>5/5</sup> | Per3 <sup>4/4</sup> | WT       |
|--------------|----------------|-----------------------------------------------|---------------------------------------------------------|---------------------|---------------------|----------|
| A_52_P267651 | <i>Arntl</i>   |                                               |                                                         | -0.06289            | 0.14908             | -0.01202 |
| A_51_P272553 | <i>Bhlhe40</i> |                                               |                                                         | -0.02212            | -0.07854            | -0.06550 |
| A_51_P451176 | <i>Bhlhe41</i> |                                               | P = 0.0032                                              | 0.18719             | 0.05677             | -0.24150 |
| A_52_P618912 | <i>Bhlhe41</i> |                                               |                                                         | 0.09504             | 0.14551             | -0.26483 |
| A_52_P161365 | <i>Clock</i>   |                                               |                                                         | 0.08955             | -0.02715            | 0.05125  |
| A_52_P279391 | <i>Clock</i>   |                                               |                                                         | 0.07064             | -0.15654            | -0.07816 |
| A_52_P334670 | <i>Clock</i>   |                                               |                                                         | 0.05231             | -0.09172            | 0.21352  |
| A_52_P334677 | <i>Clock</i>   |                                               | P = 0.0377                                              | -0.02105            | -0.19695            | 0.10035  |
| A_51_P302204 | <i>Cry1</i>    |                                               |                                                         | -0.05304            | 0.16666             | -0.09487 |
| A_52_P420500 | <i>Cry1</i>    |                                               | P = 0.0071                                              | -0.53089            | -0.47892            | 0.57222  |
| A_51_P135542 | <i>Cry2</i>    |                                               | P = 0.0017                                              | 0.26195             | 0.13782             | -0.45281 |
| A_52_P248378 | <i>Cry2</i>    |                                               | P = 0.0078                                              | 0.08495             | 0.18414             | -0.16797 |
| A_51_P136277 | <i>Csnk1d</i>  |                                               | P = 0.0094                                              | 0.01389             | 0.27917             | -0.39669 |
| A_51_P359813 | <i>Csnk1d</i>  |                                               |                                                         | -0.01190            | -0.04583            | -0.01672 |
| A_52_P11576  | <i>Csnk1d</i>  |                                               | P = 0.0019                                              | 0.01862             | 0.20343             | -0.43821 |
| A_52_P477369 | <i>Csnk1d</i>  |                                               | P = 0.0015                                              | 0.02986             | 0.20707             | -0.64890 |
| A_51_P429197 | <i>Csnk1e</i>  |                                               |                                                         | 0.15034             | -0.05504            | 0.00226  |
| A_52_P542419 | <i>Csnk1e</i>  |                                               |                                                         | -0.02476            | -0.03711            | -0.01421 |
| A_51_P180492 | <i>Dbp</i>     |                                               |                                                         | 0.09361             | 0.10192             | -0.18879 |
| A_52_P79889  | <i>Npas2</i>   |                                               | P = 0.0418                                              | 0.13054             | 0.03951             | -0.21103 |
| A_51_P223776 | <i>Nr1d1</i>   |                                               |                                                         | 0.17853             | 0.19377             | -0.22922 |
| A_52_P130952 | <i>Nr1d1</i>   |                                               |                                                         | -0.01569            | 0.24713             | -0.35349 |
| A_52_P130961 | <i>Nr1d1</i>   |                                               |                                                         | -0.22156            | 0.01417             | -0.34439 |
| A_52_P303891 | <i>Nr1d2</i>   |                                               | P = 0.0109                                              | 0.00165             | -0.09362            | 0.13994  |
| A_52_P79889  | <i>Per1</i>    |                                               | P = 0.0412                                              | 0.14551             | 0.04336             | -0.12888 |
| A_51_P282760 | <i>Per2</i>    |                                               |                                                         | 0.10941             | -0.02899            | -0.01415 |
| A_52_P536869 | <i>Per2</i>    |                                               |                                                         | 0.03497             | 0.22631             | -0.15680 |
| A_51_P258493 | <i>Per3</i>    |                                               | P = 0.008                                               | 0.22901             | -0.04939            | -0.45997 |
| A_51_P477779 | <i>Rora</i>    |                                               |                                                         | 0.00057             | -0.16541            | 0.01888  |
| A_52_P652442 | <i>Rora</i>    |                                               |                                                         | 0.05234             | -0.04869            | -0.05583 |
| A_52_P652950 | <i>Rora</i>    |                                               |                                                         | 0.10809             | -0.05947            | -0.07725 |

Supplemental table S1B: Clock gene expression in cortical samples

| <i>Per3</i> <sup>4/4</sup> |             | <i>Per3</i> <sup>5/5</sup> |             |
|----------------------------|-------------|----------------------------|-------------|
| Gene/Probe                 | Fold change | Gene/Probe                 | Fold change |
| <i>Ccl21a</i>              | -3.39       | <i>Lct</i>                 | -3.38       |
| <i>Gdpd3</i>               | 2.76        | <i>A_52_P788961</i>        | 2.81        |
| <i>Lcn12</i>               | -2.32       | <i>Grn</i>                 | -2.38       |
| <i>Pttg1</i>               | 2.31        | <i>8430429K09Rik</i>       | 2.25        |
| <i>Prl</i>                 | -2.18       | <i>Dsp</i>                 | -2.20       |
| <i>Dyrk4</i>               | -2.17       | <i>Neurod6</i>             | -1.98       |
| <i>LOC674214</i>           | -1.95       | <i>Sln</i>                 | -1.96       |
| <i>Slx1b</i>               | -1.81       | <i>A_51_P311235</i>        | -1.90       |
| <i>Ugt2b38</i>             | -1.78       | <i>Agxt</i>                | -1.87       |
| <i>Apoc4</i>               | 1.77        | <i>Hamp</i>                | -1.62       |
| <i>Tsix</i>                | 1.68        | <i>Neurod2</i>             | -1.62       |
| <i>Gm3893</i>              | -1.56       | <i>Thbs4</i>               | -1.61       |
| <i>Wfdc2</i>               | 1.27        | <i>Ccl21a</i>              | -1.57       |
| <i>A930018M24Rik</i>       | -1.23       | <i>Fam105a</i>             | 1.54        |
| <i>AU023762</i>            | -1.19       | <i>Grin2a</i>              | -1.53       |
| <i>Gh</i>                  | -1.19       | <i>A_52_P348256</i>        | -1.52       |
| <i>Sln</i>                 | 1.13        | <i>Egr3</i>                | -1.49       |
| <i>A_52_P36261</i>         | 1.10        | <i>Thbs4</i>               | -1.49       |
| <i>Myh1</i>                | 1.10        | <i>Spink8</i>              | -1.47       |
| <i>Folr1</i>               | 1.06        | <i>9430091E24Rik</i>       | -1.43       |
| <i>Sult1c2</i>             | 0.99        | <i>Wipf3</i>               | -1.42       |
| <i>Tmem72</i>              | 0.93        | <i>Fabp1</i>               | -1.39       |
| <i>A_51_P417257</i>        | -0.93       | <i>Mup5</i>                | -1.38       |
| <i>Chi3l4</i>              | -0.89       | <i>2310002F09Rik</i>       | -1.36       |
| <i>Tns1</i>                | -0.89       | <i>Tnfrsf25</i>            | -1.36       |
| <i>Cd38</i>                | 0.88        | <i>Kcne2</i>               | -1.33       |
| <i>Myh4</i>                | 0.88        | <i>Itпка</i>               | -1.33       |
| <i>Defb22</i>              | -0.87       | <i>Hormad1</i>             | -1.32       |
| <i>Mpl</i>                 | -0.84       | <i>Egr4</i>                | -1.30       |
| <i>Eif2a</i>               | -0.83       | <i>Dusp18</i>              | 1.24        |

Table S2: Top 30 fold change probes for each genotype compared to WT in the hypothalamus during the ultradian light-dark cycle.
